# Supplementary material for: The synthesis of a Bi2MoO6/Bi4V2O11heterojunction photocatalyst with enhanced visible-light-driven photocatalytic activity
Source: Royal Society of Chemistry journal article supplement (doi:10.1039/c7ra12766a), 2018-01-01
Supplement: c7ra12766a1.pdf [file c7ra12766a1.pdf]

Supporting Information

## Synthesis of $\text{Bi}_2\text{MoO}_6/\text{Bi}_4\text{V}_2\text{O}_{11}$ heterojunction photocatalyst with enhanced visible-light-driven photocatalytic activity

Chol-Nam Ri\*, Song-Gol Kim, Kyong-Sik Ju, Hyok-Su Ryo, Chol-Ho Mun, U-Hyon Kim

Institute for electronic materials, Kim Il Sung University, Pyongyang, 999093, Democratic People's Republic of Korea

\*Corresponding Author: rcn906@yahoo.com

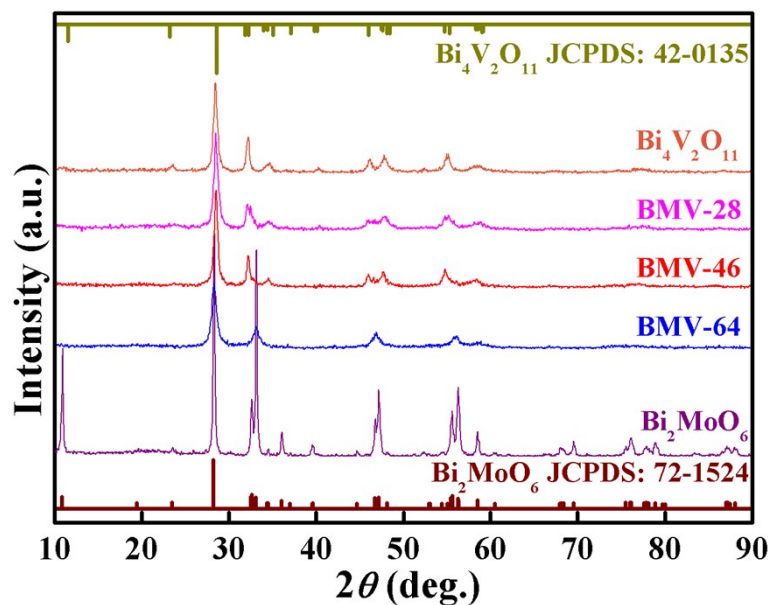

**Fig. S1.** XRD patterns of pristine  $\text{Bi}_2\text{MoO}_6$ ,  $\text{Bi}_4\text{V}_2\text{O}_{11}$  and BMV-28, BMV-46, BMV-64 composite samples.

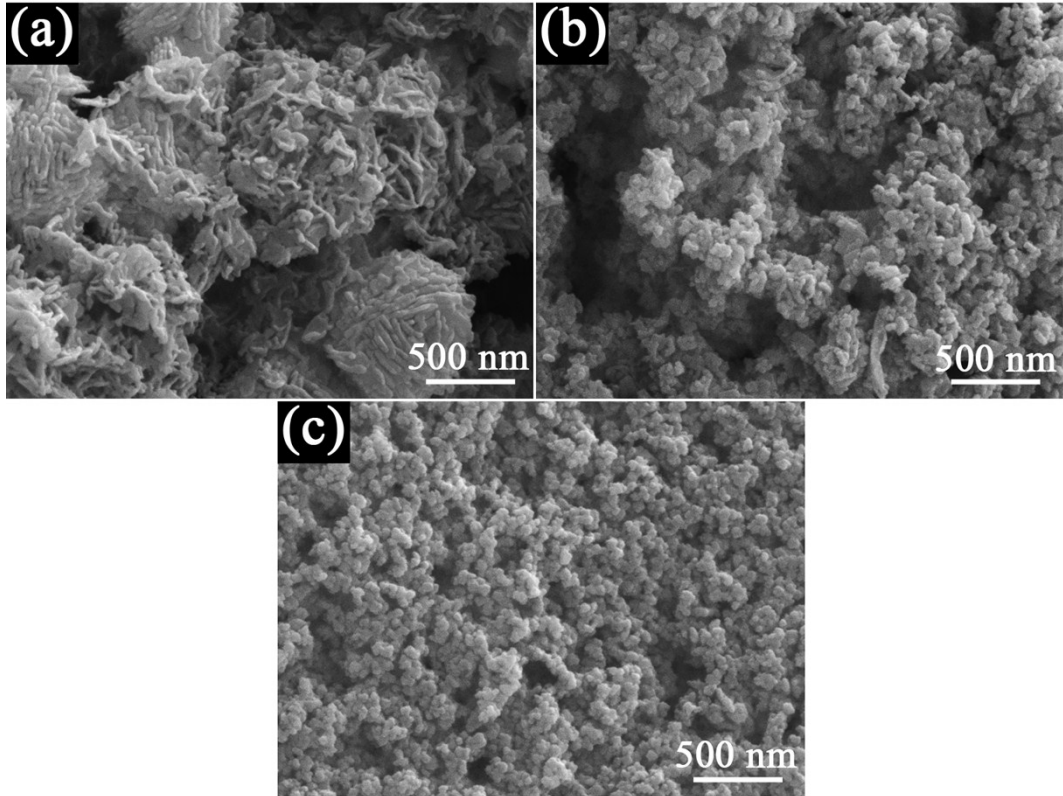

Fig. S2. SEM images of (a) BMV-28, (b) BMV-46 and BMV-64 composite samples.

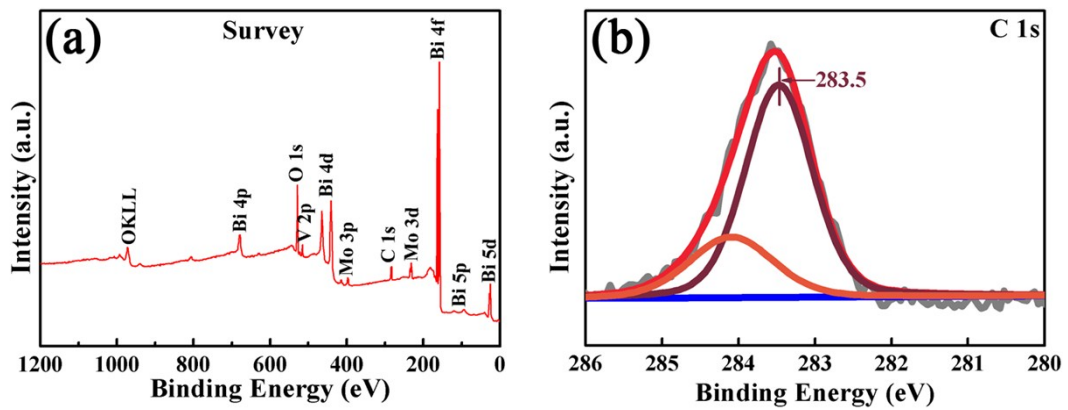

Fig. S3. (a) Full survey spectra and (b) C 1s spectra of BMV-55 composite.

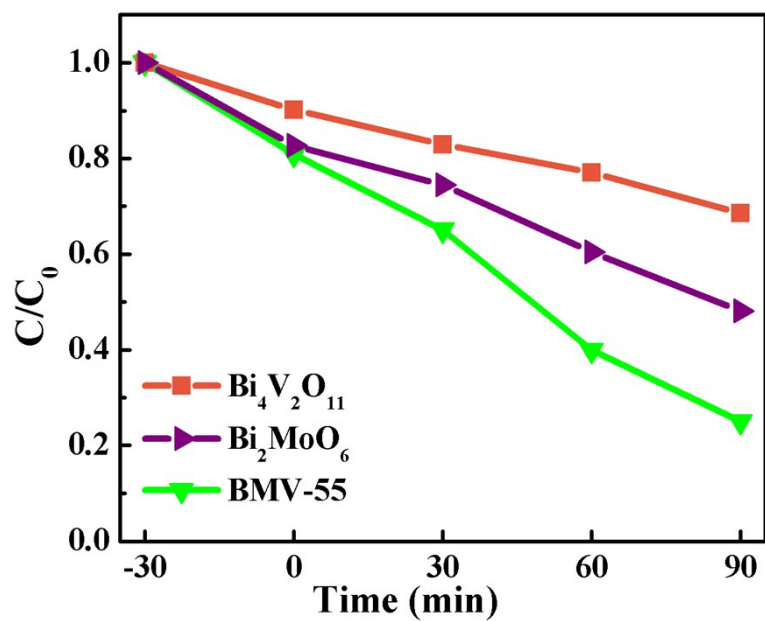

**Fig. S4.** Photocatalytic degradation plots of MB in the absence of  $\text{H}_2\text{O}_2$  over pristine  $\text{Bi}_2\text{MoO}_6$ ,  $\text{Bi}_4\text{V}_2\text{O}_{11}$ , BMV-55 composite samples.

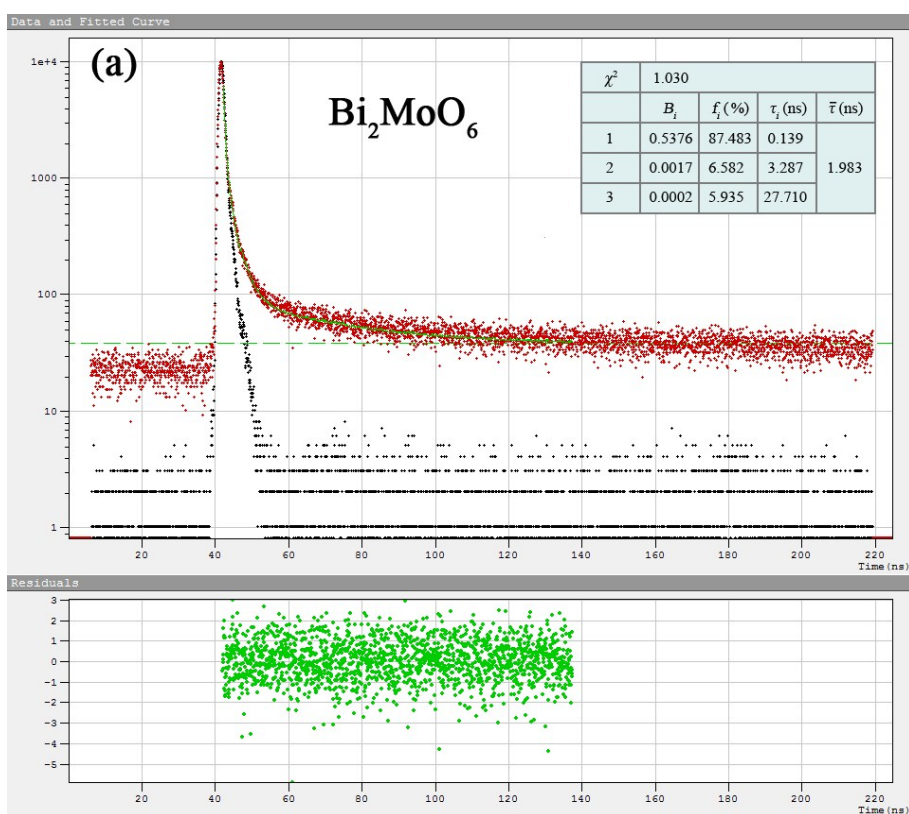

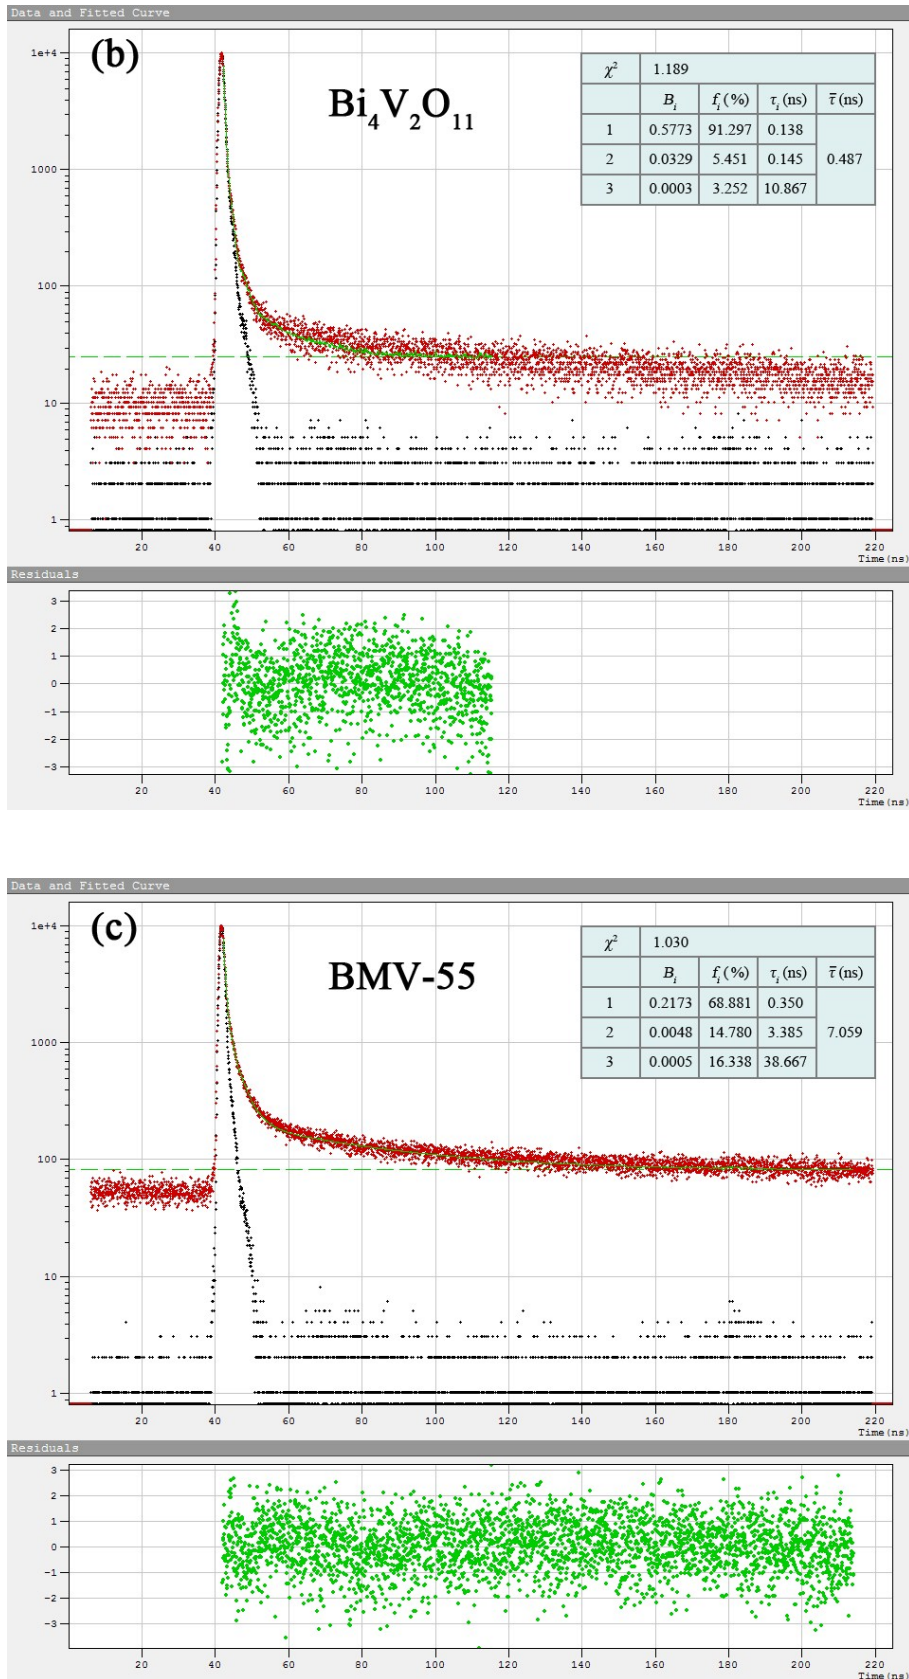

**Fig. S5.** Fitting curves using 3-exponential model and resulting of kinetic parameters; (a) as-fabricated pristine  $\text{Bi}_2\text{MoO}_6$ , (b)  $\text{Bi}_4\text{V}_2\text{O}_{11}$  and (c) BMV-55 composite samples.
